1 **Meiosis and Kinetochores genes are used by cancer cells as genome destabilizers and**  
2 **transformation catalysts**

3

4 Roshina Thapa<sup>1</sup>, Swetha Vasudevan<sup>1</sup>, Mimi Abo-Ayoub Ashqar<sup>1</sup>, Eli Reich<sup>1</sup>, Nataly Kravchenko-  
5 Balasha<sup>1\*</sup> and Michael Klutstein<sup>1\*</sup>

6

7

8 <sup>1</sup> Institute of Dental Sciences, Faculty of Dental Medicine, The Hebrew University of Jerusalem,  
9 P.O.B. 12272, Ein Kerem, Jerusalem, ISRAEL 91120

10

11 Corresponding Authors: Michael Klutstein and Nataly Kravchenko-Balasha

12 Email: [michaelk@ekmd.huji.ac.il](mailto:michaelk@ekmd.huji.ac.il) ; [natalyk@ekmd.huji.ac.il](mailto:natalyk@ekmd.huji.ac.il)

13

14

15

16

17

18 \* M.K and N.K.B contributed equally to this work

19

20 **Keywords:** Cancer, Chromosomal instability, Meiosis genes, Kinetochores genes, overexpression,  
21 CNV, surprisal analysis.

22

23

24

25

26

27

28

29

30

31

32

33 **Abstract:**

34 Cancer cells have an altered transcriptome which contributes to their altered behaviors compared  
35 to normal cells. Indeed, many tumors express high levels of genes participating in meiosis or  
36 kinetochore biology, but the role of this high expression has not been fully elucidated. In this study  
37 we explore the relationship between this overexpression and genome instability and transformation  
38 capabilities of cancer cells. For this, we obtained expression data from 5 different cancer types  
39 which were analyzed using computational information-theoretic analysis. We were able to show  
40 that highly expressed meiotic/kinetochore genes were enriched in the altered gene expression  
41 subnetworks characterizing unstable cancer types with high chromosome instability (CIN).  
42 However, altered subnetworks found in the cancers with low CIN did not include meiotic and  
43 kinetochore genes. Representative gene candidates, found by the analysis to be correlated with a  
44 CIN phenotype, were further explored by transfecting genomically-stable (HCT116) and unstable  
45 (MCF7) cancer cell lines with vectors overexpressing those genes. This overexpression resulted in  
46 an increase in the numbers of abnormal cell divisions and defective spindle formations and in  
47 increased transformation properties in stable cancer HCT116 cells. Interestingly, the same  
48 properties were less affected by the overexpressed genes in the unstable MCF7 cancer cells. Our  
49 results indicate that overexpression of both meiosis and kinetochore genes is capable of driving  
50 genomic instability and cancer progression.

51  
52  
53  
54  
55  
56  
57  
58  
59  
60  
61  
62  
63

64 **Introduction:**

65 Cancer is a complex disease, characterized by numerous genomic aberrations and by dysregulation  
66 of gene expression. Along with overexpression of oncogenes and repression of tumor suppressors,  
67 tumors often express various tissue specific genes, not necessarily related to their primary tissue  
68 of origin [1-3]. In particular, cancer cells have been found to frequently express genes that are  
69 normally restricted to the testis. These genes can be referred to as cancer/testis antigens (CTA) [4].  
70 Many CTA have been found to be involved in meiotic divisions, which occur in the testis and  
71 include processes with inherent genome instability. This property of the meiotic genes has led to  
72 the intriguing idea that the expression of CTA in tumors may drive genome and chromosome  
73 instability in those tumors [5,6].

74 Chromosome instability (CIN) is among the most important cancer hallmarks. CIN tumors, which  
75 have the propensity to constantly change their genome, have worse prognosis than non-CIN tumors  
76 [7,8]. Previous work shows that CIN tumors use several molecular mechanisms to achieve their  
77 instability, such as replication stress and modulation of the spindle assembly checkpoint [9-11].  
78 Due to inherent functions of CTA genes involved in meiosis, that include mono-orientation of  
79 sister kinetochores and DNA double-strand break formation and repair, CTA have become prime  
80 candidates for initiating an additional mechanism involved in CIN [12-15].

81 Several small scale studies have already shown that a cohort of meiotic genes is expressed in  
82 different tumors [4], [6,16-19]. Importantly, a previous study has shown that overexpression of the  
83 meiotic cohesin Rec8 in mitotic fission yeast cells causes uniparental disomy of chromosomes and  
84 CIN in this organism [20].

85 Another emerging player in the generation of CIN in cancer is the kinetochore [21]. Kinetochores  
86 are protein complexes built on centromeres, the specialized loci on eukaryotic chromosomes,  
87 which play a key role in mediating chromosome segregation [21]. This is mainly achieved through  
88 the physical connection between microtubules and the centromeric DNA [22]. The balance between  
89 all the different kinetochore components is crucial for maintaining genome stability and correct  
90 ploidy. Under- or overexpression of different kinetochore components may lead to the formation  
91 of chromosomes with very little microtubule attachment, or on the contrary, too many  
92 microtubules binding to a chromosome [22-25]. Eventually this may lead to non-disjunction and  
93 aneuploidy [23-25]. Overexpression of specific kinetochore components such as the inner-  
94 centromere protein CENP-A (centromere specific ortholog of histone H3 serving as the structural

95 basis of the kinetochore) leads to deposition of kinetochore components on additional loci in a  
96 chromosome already containing a centromere, and the formation of di-centric chromosomes,  
97 resulting in a breakage-fusion-bridge cycle of chromosomes and CIN [26]. On the other hand,  
98 insufficient CENP-A can result in senescence of cells and apoptosis [27,28]. Misregulation of  
99 kinetochore components has been observed in many tumors [29]. Alterations in the expression  
100 levels of kinetochore genes may also cause CIN in tumors, as well as affect the prognosis of  
101 specific patients and their response to therapy [29]. Despite all these studies the role that the  
102 kinetochores play as drivers of CIN during tumorigenesis is not fully understood.

103 To explore further the relationship between meiosis and kinetochore genes and genome instability  
104 we performed a large scale computational analysis of normal and cancer tissues which were  
105 obtained from breast, bladder, stomach, colorectal and cervical cancer and normal tissues, all from  
106 TCGA data (<https://portal.gdc.cancer.gov/>). We have demonstrated that tumors with high CIN  
107 harbored cancer-specific gene-gene correlation subnetworks with induced meiosis and kinetochore  
108 genes. Although tumors were heterogeneous and could be characterized by different altered gene  
109 expression subnetworks, meiosis and kinetochore altered transcripts could be found in various  
110 compositions in high CIN tumors but not in low CIN patients within the same type of cancer (see  
111 **Fig. 1**).

112 To further validate our hypothesis that meiosis and kinetochore genes drive CIN we performed  
113 experimental studies in genomically stable and unstable cancer cell lines (CIN+ and CIN<sub>low</sub>[8]). We  
114 have demonstrated that induced expression of representative meiosis and kinetochore genes in  
115 cancer cell-lines increases genome instability in this setting. Moreover, we show that this over-  
116 expression elevates significantly genome instability in genomically stable cancer cell lines, but  
117 less so in unstable cell lines. Overexpression of these genes also led to enhanced transformation  
118 and invasiveness properties of the cancer cell lines, providing experimental evidence for the  
119 involvement of meiosis and kinetochore genes in genome instability and cellular transformation.  
120 An overview of the study is summarized in Figure 1.

121

## 122 **Materials and Methods:**

### 123 **1. Data analysis**

#### 124 **1.1 Thermodynamic-based information theoretical approach (Surprisal Analysis)**

125 Matrix of gene expression data was obtained from TCGA database for each cancer type. Every  
126 dataset was profiled for thousands of transcripts (total 20,530). The matrix was used as an input  
127 for the information-theoretic surprisal analysis using MATLAB software [30] [31]. This type of  
128 analysis was utilized previously for the characterization of genomic/proteomic alterations and  
129 identification of molecular gene/protein correlation patterns characterizing big datasets [30,32,33].  
130 Briefly, we identify the expected gene expression levels at the steady state (a state in which the  
131 biological processes are balanced), and deviations thereof for each transcript  $i$  in normal and tumor  
132 subsets. The deviations occur due to environmental/genomic constraints. Any biochemical/genetic  
133 perturbation can be considered as a constraint and elicit a coordinated change in a group of  
134 transcripts (subnetwork). These subnetworks are named **unbalanced processes** and are identified  
135 through calculations of  $G_{i\alpha}$  values (=weights of participation) for each transcript  $i$  in each process  
136  $\alpha$  ( $\alpha=1,2,3$ ). **Table S1** lists  $G_{i\alpha}$  values for all transcripts in each unbalanced in each cancer type.  
137 Each transcript can participate in more than one unbalanced process due to non-linearity of  
138 biological networks. Only the transcripts located on the tails of the distributions of  $G_{i\alpha}$  values are  
139 analyzed further for biological meaning. Additionally, the analysis identifies an amplitude,  
140  $\lambda_{\alpha}(k)$ , or an importance of each process  $\alpha$  in each tissue  $k$  (**Fig. 3B**). Plots of amplitudes for all  
141 unbalanced processes in breast and other cancer types can be found in **Table S2**.

142 Sign of  $G_{i\alpha}$  and,  $\lambda_{\alpha}(k)$  means correlation or anti-correlation between the transcripts in the same  
143 process  $\alpha$  (in case of  $G_{i\alpha}$ ) or  $\alpha$  between the same processes in different tumors (in case of  $\lambda_{\alpha}(k)$ ).  
144 For example, if the process  $\alpha$  is assigned the values:  $\lambda_{\alpha}(1) = 37$ ,  $\lambda_{\alpha}(20) = 0$ ,  $\lambda_{\alpha}(33) = -39$ , it  
145 means that this process influences the tumors of the patients indexed 1 and 33 in the opposite  
146 directions, while it is inactive in patient 20. In order to calculate whether a particular transcript  
147 was induced or reduced due to a process  $\alpha$ , the product  $G_{i\alpha} * \lambda_{\alpha}(k)$  is calculated for each transcript.  
148 In summary, for each transcript we identify a set of unbalanced processes and quantify how  
149 important each process in each normal/cancer sample. Thus, a comprehensive map of unbalanced  
150 processes is obtained for each cancer or normal sample that allows to characterize each tissue in  
151 heterogeneous datasets in detail. Detailed description on how surprisal analysis is implemented in  
152 biology and how  $G_{i\alpha}$  and,  $\lambda_{\alpha}(k)$  are computed is provided in detail in [30,32,33]

153

## 154 **1.2 Computation of copy number variation**

155 We obtained data of copy number variation (CNVs) in cancer population from the TCGA genomic  
156 database. Copy number variation (CNVs) are a type of structural variant involving alterations in  
157 the number of copies of specific regions of DNA, which can be either deleted or duplicated. These  
158 chromosomal deletions and duplications involve large stretches of DNA (that is, thousands of  
159 nucleotides, which may span many different genes) but can range considerably in size as well as  
160 prevalence. Only CNVs larger than 1 Mb (large CNVs usually correlate with the genomic stability)  
161 were considered for further analysis and are thus termed ICNVs (large chromosome number  
162 variations), but we also validated that similar results are obtained if other thresholds (0.5Mb and  
163 2Mb) are implemented (**Fig. S1**). The number of ICNVs for each sample were summed and  
164 determined using R tools. The distribution for each cancer type is shown in **Fig. 2**.

165

## 166 **2. Experimental methods**

167

### 168 **2.1 Cell lines and culture**

169 HCT116 human colon adenocarcinoma cell lines were maintained in Dulbecco's Modified Eagle's  
170 medium (DMEM, Sigma), supplemented with 10% fetal bovine serum (FBS), 1% PenStrep (100  
171 U/mL Penicillin and 100 µg/mL Streptomycin) and 4 mM L-glutamine in a 37 °C incubator (5%  
172 CO<sub>2</sub>). MCF-7 breast cancer cell lines were maintained in RPM-1640, (Sigma), supplemented with  
173 10% fetal bovine serum (FBS), 1% PenStrep (100 U/mL Penicillin and 100 µg/mL Streptomycin)  
174 and 4 mM L-glutamine in a 37 °C incubator (5% CO<sub>2</sub>).

175

### 176 **2.2 DNA preparation and Transfection.**

177 Meiotic and kinetochore genes tagged with Enhanced Green Fluorescent Protein (EGFP) (from  
178 BD Biosciences) were used. The GenElute, HP Plasmid Midiprep Kits (Bio Basic Inc, Canada).  
179 was used to isolate the plasmid. All cells were transfected 24h after initial plating. Transfections  
180 were performed using the Mirus transfection reagent (cat-81094967, Zotal, USA) with a 4:1  
181 (transfection reagent: DNA) ratio. Transfection efficiency for HCT116 and MCF-7 cells was  
182 evaluated by counting the number of GFP positive cells by immunofluorescent microscope and  
183 calculating the percentage based on the total number of cells.

184

### 185 **2.3 Cell synchronization and immunostaining.**

186 HCT116 and MCF-7 cells were synchronized by double thymidine block [34]. Cells were treated  
187 with 2mM thymidine for 18 h in medium supplemented with 10% FBS. After washing twice  
188 with PBS, cells were cultured in fresh medium for 9h and again treated for 15h with media  
189 containing 2mM thymidine (10% FBS). After washing cells with PBS, the block was released by  
190 the incubation of cells in fresh medium and cells were harvested at 9h (HCT116) and 11h (MCF-  
191 7) and fixed with methanol. After that immunostaining was performed. Cells were washed 3  
192 times with PBS and blocked with 5% BSA diluted with PBS. After that, cells were incubated  
193 with first Ab ( $\alpha$ -tubulin antibodies, T5168, Sigma, USA, 1:400 dilution) for 2 hr at room temp.  
194 After washing twice with PBS, cells were incubated with a secondary Ab (donkey anti-mouse  
195 IgG antibodies, life science, USA, 1:200 dilution) for 1 hr at room temp followed by washing the  
196 cells twice with PBS. The cells were then incubated with Hoechst 33342 (cat: PIR-62249  
197 Thermo scientific, Germany) diluted 1:10,000 for 5-30min for DNA visualization.

198

### 199 **2.4 Soft agar assay**

200 Colony formation on soft agar was assayed in triplicate by plating 5000 cells in a layer of 0.3%  
201 (w/v) agar in assay DMEM (HCT116) and RPMI medium (MCF-7) medium, on top of a 0.6%  
202 (w/v) agar layer. Plates were incubated at 37 °C and 5% (v/v) CO<sub>2</sub> for 3 weeks, and the medium  
203 was replaced every 4 d. Colonies were stained using 0.005% (w/v) Crystal Violet solution, and an  
204 image of the whole well was acquired using an Olympus SZ61 stereomicroscope. Colonies were  
205 counted using ImageJ software (<http://imagej.nih.gov/ij/>). The area and number of colonies was  
206 calculated.

207

### 208 **3. Statistics**

209 Significance was determined using a two-tailed Student's *t* test. The  $p < .001$  was considered as  
210 extremely significant (\*\*\*),  $p < .01$  as highly significant (\*\*), and  $p < .05$  as statistically  
211 significant (\*).

212

### 213 **Results:**

214

### 215 **Degree of genome instability varies between different cancer types**

216 We hypothesized that the extent of alterations in gene expression levels of meiotic and kinetochore  
217 genes may be related to the degree of genome instability. To explore this, we determined the  
218 distribution of large DNA tracts which exhibited copy number variations in five different cancer  
219 types, namely breast (n=1104), bladder (n=407), stomach (n=415), colorectal (n=383) and cervical  
220 (n=305) cancer patients and compared them to normal tissues from breast (n=114), bladder (n=19)  
221 stomach (n=20) colorectal (n=51) and cervix (n=3), all from TCGA database. Copy number  
222 variation (**CNV**) is a type of chromosomal structural variation that involves alterations in DNA  
223 copy number of specific genome regions. Those regions can be either deleted or duplicated. The  
224 chromosomal deletions and duplications can involve large stretches of DNA, e.g. thousands of  
225 nucleotides, which may span many different genes. In our analysis we included only CNVs that  
226 were larger than 1 Mb (ICNV= large CNVs of more than  $1 \times 10^6$  Base pairs, 1 Mb). The 1Mb cutoff  
227 was used as this size of CNV occurs rarely in normal human population (CNVs of >1 Mb occur  
228 naturally in <1% in the general population ([35]), but can be found in cancer tissues. Despite that,  
229 we have also analyzed a threshold of 0.5 Mb and 2 Mb with no change in the conclusions (**Fig S1**).  
230 We found that Bladder tumors had a large number of DNA regions with ICNVs (high ICNV value)  
231 with a maximum value of 850 ICNVs and an average value of 112 ICNVs. Breast and stomach  
232 cancers also show high values of ICNVs (with a maximum of 821 ICNVs, and average of 109  
233 ICNVs for breast and a maximum of 650 ICNVs and average of 108 ICNVs for stomach cancer)  
234 (**Fig 2A,B**). On the other hand, colorectal and cervical cancer types have less DNA regions with  
235 ICNV (max 402, avg ICNVs=79 and max 278, avg ICNVs= 80 respectively) (**Fig. 2A, B**).  
236 (**p<0.001**). This finding allowed us to compare between low and high CNV cancers and confirm a  
237 relationship between altered expression of meiosis and kinetochore genes and genome instability.

238  
239 **Altered gene expression networks, characterizing cancer samples with genome instability,**  
240 **are enriched with overexpressed kinetochore and meiosis transcripts**

241 To explore the relationship between the degree of genome instability (high or low CNV) and the  
242 altered expression of meiosis and kinetochore we performed a large scale, unbiased computational  
243 analysis of over 2800 normal and cancer tissues from the 5 cancer types mentioned above. We  
244 utilized a computational information-theoretic surprisal analysis (SA) [32,33] in order to identify  
245 altered gene correlation co-expressed networks in cancer tissues, named *unbalanced processes*.  
246 Several different unbalanced processes (=subnetworks) may occur in a particular cancer type due



247 to inter-patient heterogeneity (**Fig. 3A**). SA deciphers a number of unbalanced processes in each  
248 cancer type, by calculating the expected expression levels of the tested molecules, such as  
249 transcripts or proteins, at the steady state (i.e. the balanced, unconstrained state), and the deviations  
250 thereof due to environmental or genomic constraints. These constraints elicit coordinated changes  
251 in expression levels of transcripts/proteins, named unbalanced processes (see [32,33] for more  
252 details). Co-varying altered transcripts that deviate from the steady state significantly and in a  
253 coordinated manner are grouped and each group represents an unbalanced process  $\alpha$ . The analysis  
254 determines those transcripts through calculation of a “weight of participation”,  $G_{i\alpha}$ , of each  
255 transcript  $i$  in a process  $\alpha$  (**Table S1**). Every altered transcript can be involved in several  
256 unbalanced processes.

257 Next the analysis assigns an amplitude,  $\lambda_{\alpha}(k)$ , an importance of each process  $\alpha$  in each tissue  $k$   
258 (**Fig. 3B**). **Table S2** lists amplitudes of all processes in every cancer type and in every tissue.  
259 Several distinct unbalanced processes can be active in each cancer type/cancer tissue [33,36].  
260 Detailed description of the analysis can be found in [33].

261 Using SA we identified 16 distinct unbalanced processes in breast cancer of which 12 were  
262 determined to be *cancer specific* (**Fig. 3C**, for example process 3 appears in both normal and cancer  
263 tissues, thus does not appear in the plot of **Fig. 3C**). Rigorous error analysis, as described in  
264 [33,36,37] and Methods, was applied in order to determine a number of unbalanced processes  
265 beyond the noise in each dataset. Processes with lower indices, such as processes 1 and 2, were  
266 the most dominant and appeared in high a percentage of the patients. For example, the most  
267 dominant process, process 1, which was found in 21% of breast cancer patients (239 of 1095 breast  
268 cancer samples with positive ( $\lambda_1(k)$ ) amplitudes, **Fig. 3B**; see Table S3 which includes biological  
269 categories characterizing this and other processes. Genes with positive  $G_{i\alpha}$  values (Tab “G1  
270 positive” in Table S3) are induced in the tissues with positive  $\lambda_1(k)$  amplitudes and genes with  
271 negative  $G_{i\alpha}$  values are reduced in those tissues and vice versa. See Methods for more details).  
272 Process 2 appeared in 20% of breast cancer patients (**Table S2**). Those processes were enriched  
273 for induced meiosis/ kinetochore genes (**Fig. 3C**). Interestingly, less common unbalanced  
274 processes (with higher indices) included significantly less kinetochore and meiosis genes (**Fig.**  
275 **3C**). Similar results were found for the two other types of cancer with high values of ICNVs:

276 bladder cancer and stomach cancer (**Fig. 3D**, upper panel; **Tables S4, S5** include all biological  
277 categories associated with those processes).

278 In contrast, the most dominant unbalanced processes (**Table S6-S7** include all biological  
279 categories associated with those processes) in cancers with lower values of ICNVs (colorectal and  
280 cervical cancers) were not particularly enriched for meiosis and/or kinetochore genes (**Fig. 3D**,  
281 lower panel). These results show a correlation between high ICNV values and overexpression of  
282 meiosis/ kinetochore genes (**Fig.2 and Fig.3 C,D**) and evince a possibility that highly expressed  
283 meiosis and kinetochore genes might be involved in genome instability of those cancers.

284 To further investigate the correlation between the altered expression levels of meiosis/kinetochore  
285 genes and genome instability, we examined every cancer type individually. We compared cancer  
286 samples with highly unstable genomes (10% of the samples with highest ICNVs values) to the  
287 cancer samples with relatively stable genomes (10% of the samples with lowest ICNVs values)  
288 within the same cancer type. The results demonstrate that in breast cancer, the most dominant  
289 processes 1 and 2, harboring a large number of induced meiosis/kinetochore genes, appeared in a  
290 relatively high percent of cancer tissues with high ICNVs (~25% and 50% respectively, **Fig. 4A**).  
291 Patients having more stable genomes (lower ICNVs) did not harbor those processes (**Fig. 4A**).  
292 Similar results were found in bladder and stomach cancers (**Fig. 4B-C**). In contrast, such a  
293 correlation between the enrichment of induced meiosis/kinetochore genes and genome instability  
294 was not found in the cancer types with relatively stable genomes (colorectal and cervical cancers,  
295 **Fig. S2**).

296 These results point to a high correlation between the large and enriched groups of induced  
297 meiosis/kinetochore transcripts in dominant cancer-specific processes and genome instability.  
298 This suggests that meiosis and kinetochore genes may have an active role in driving CIN. This  
299 strong correlation prompted us to examine this hypothesis experimentally.

300

### 301 **Over expression of representative meiosis and kinetochore genes in genomically stable and** 302 **unstable cancer cell lines**

303 In order to test our hypothesis, we selected several representative kinetochore and meiosis genes  
304 participating in the dominant cancer-specific unbalanced processes (with high  $G_{i\alpha}$ ) and  
305 overexpressed them in cancer cell lines. The most dominant kinetochore gene, which was found  
306 to be associated with CIN, was HJURP (found in the dominant unbalanced processes of all high

307 CIN cancers, **Table S8**). HJURP (together with the protein it chaperones, CENP-A) represents the  
308 structural basis of the kinetochore structure [19,38].

309 CENP-A is the histone H3 homolog that forms a platform upon which all other kinetochore  
310 components assemble [39] [40]. Since CENP-A is functionally related to HJURP and was also found  
311 in all dominant processes of the high CIN tumors, we have also overexpressed CENP-A in our  
312 assays.

313 To select representatives among the meiotic genes we looked at the unbalanced process 3 in  
314 bladder cancer as it included the highest number of meiosis-related genes in comparison to other  
315 tumors analyzed. We thus overexpressed the two most dominant genes in this process: DMC1 and  
316 SMC1B.

317 As a negative control, we overexpressed *REC8*, which is a bone fide meiotic gene but was not  
318 found to participate in any dominant unbalanced processes in our analysis. REC8 is a meiosis  
319 specific component of cohesin, and participates in homologous chromosome pairing and in sister  
320 chromatid mono-orientation [41-43].

321 All genes were overexpressed in two cancer cell-lines- HCT116, a colon cancer cell line which is  
322 CIN negative and has a relatively stable genome, and MCF7, a breast cancer cell line which shows  
323 high chromosome instability [8,44]. The genes were fused to GFP to monitor their expression (**Fig.**  
324 **S3**).

325

### 326 **Over expression of meiosis and kinetochore genes promotes genome instability in cancer cell** 327 **lines**

328 In order to check whether the selected meiosis and kinetochore genes promote genome instability  
329 we evaluated the number of cells with lagging chromosomes, anaphase bridges, uneven  
330 segregation of chromosomes and deviation from a bipolar spindle configuration as a means to  
331 estimate genome stability [25,45-47]. **Figure 5 (B, C and G)** shows that overexpression of the  
332 kinetochore genes, CENP-A and HJURP, and one of the meiosis genes, DMC1 (but not SMC1B)  
333 in HCT116, caused a significant elevation in anaphase bridges and lagging chromosomes.  
334 Overexpression REC8, the negative control we used, did not affect the chromosome segregation  
335 phenotype. **Figure 5 (E, F and I)** also shows that overexpression of all meiosis and kinetochore  
336 genes in HCT116 cells caused a significant elevation in mono-polar and multi-polar spindle  
337 formation compared to an empty plasmid.

338 In contrast, overexpression of meiosis and kinetochore genes in the genomically unstable MCF7  
339 cells caused a significantly less severe phenotype (**Figure 5, H and J**). Only CENP-A  
340 overexpression caused a small elevation in the occurrence of mono-polar and multi-polar spindles  
341 (**Fig. 5J**). However, all other phenotypes, related to the spindle (**Fig. 5J**) and chromosome  
342 segregation (**Fig. 5H**), were not significantly affected in MCF7 cells in response to induced  
343 expression of meiosis/kinetochore genes.

344 These results demonstrate that overexpression of our identified kinetochore and meiosis genes in  
345 genomically stable cells has the ability to promote genome instability. The same overexpression  
346 has a significantly smaller effect in a cell line that has already acquired a high degree of genome  
347 instability before the gene transfection.

### 348 349 **Over expression of meiosis and kinetochore genes promotes invasiveness of cancer cells**

350 Cancers with unstable genomes are often more invasive than cancers with stable genomes [8,48,49].  
351 Therefore, we hypothesized that overexpression of meiosis and kinetochore genes and promotion  
352 of genome instability could induce invasiveness and transformation properties of cancer cells.

353 To examine a change in the transformation properties of the cells we tested an ability of HCT116  
354 and MCF7 cells to generate colonies in soft agar following overexpression of the  
355 meiosis/kinetochore genes [50,51]. **Figure 6 and S4** show that overexpression of all meiosis and  
356 kinetochore genes in HCT116 cells enhanced both the number of colonies generated and the size  
357 of the colonies, demonstrating enhanced cancer transformation properties. However, the number  
358 of colonies, overexpressing the negative control-Rec8 was smaller, although the area was similar  
359 to others. In general, the overexpression of kinetochore genes caused a greater effect than meiosis  
360 genes. In addition, overexpression of DMC1 created bigger colonies than the other meiotic genes  
361 we overexpressed. Surprisingly, although the genome instability parameters we previously  
362 checked were not increased in MCF7 cells upon the gene overexpression (see **Fig. 5**), an elevation  
363 in the number and size of the colonies in soft agar was detected in this cell line (**Fig. S5**). These  
364 results show that induced invasiveness and cellular transformation of the tested cell lines may  
365 correspond to the induced expression of meiosis and kinetochore genes, although not necessarily  
366 linked to the ability of those genes to induce genome instability parameters.

367  
368

## 369 **Discussion**

370 Genome instability and the mechanisms behind it are among central questions in cancer biology  
371 in recent decades [52]. Here we investigate a new possible route to achieve genome instability in  
372 cancer by the overexpression of genes which participate in meiosis or in kinetochore formation.  
373 The process of meiosis includes inherent genome instability which occurs through meiotic  
374 homologous recombination and sister chromatid mono-orientation. The perturbed expression of  
375 kinetochore proteins has also potential to affect the processes involved in proper chromosome  
376 segregation and genome stability.

377 We have taken a multi-pronged approach to support our hypothesis and have used computational  
378 analysis of large cancer datasets and an experimental approach utilizing cancer cell line models.

379 Using information-theoretic surprisal analysis of five different cancer types, obtained from TCGA  
380 database, we have shown that the most abundant altered gene expression networks, characterizing  
381 unstable cancers, were enriched with meiosis and kinetochore transcripts. Altered gene expression  
382 networks, characterizing cancers with low ICNVs were not enriched with those transcripts.  
383 Moreover, in unstable cancers, patients with the highest ICNVs were characterized by the  
384 unbalanced processes enriched with meiosis and kinetochore genes, in contrast to the patients with  
385 low ICNVs within the same cancer type, which did harbor those processes.

386 Although these analyses were merely restricted to a correlation, the finding of this correlation in  
387 five major cancer types, and the extension of the correlation to the specific patient groups within  
388 each cancer hints to a strong link between the overexpression of meiosis and kinetochore genes  
389 and genomic instability in tumors.

390 In order to go beyond this correlation and demonstrate a causative effect, we performed  
391 experiments in which several representative meiosis and kinetochore genes, as identified by our  
392 computational analysis, were expressed in two cancer cell lines. The overexpression caused an  
393 elevation of genome instability parameters in the stable HCT116 cell lines, but less so in the  
394 unstable MCF7 cell line. However, overexpression caused both cell lines to increase their  
395 invasiveness and transformation properties as measured by colony formation ability in soft agar.

396 These results could suggest that induced invasiveness (observed in both cell lines) is not directly  
397 related to the induced genome instability (observed in HCT116) although they both result from the  
398 overexpression of the same genes. Another possibility is that even a slight and undetectable

399 increase in genome instability (as in MCF-7), can cause a large effect on the invasiveness of those  
400 cells. Further experiments are needed to distinguish between these possibilities.

401 Our results also demonstrate that meiosis and kinetochore genes can serve as markers for genome  
402 instability. Future work should assess the accuracy and sensitivity of those markers and whether  
403 downregulating meiosis and kinetochore genes could be used as a therapeutic approach.

404 In conclusion, we have shown that genome instability in tumors could be driven by overexpression  
405 of specific classes of genes, namely meiosis and kinetochore genes, which are involved in genome  
406 organization and maintenance of undifferentiated cells. This finding may have medical  
407 implications regarding the identification of genome instability in tumors, diagnosis and eventually  
408 the treatment of unstable tumors through manipulation of these gene networks.

409

#### 410 **Figure Legends:**

411

412 **Figure 1. Schematic overview of how mis-expressed meiosis and kinetochore genes induce**  
413 **chromosome instability.** 2821 tumors tissues of five cancer types obtained from TCGA datasets  
414 were analyzed. Cancer types were categorized into two subtypes: cancer with unstable genomes  
415 (unstable cancers) and cancer with a more stable genome (stable cancers). Information-theoretic  
416 analysis is utilized to study the altered gene expression networks in the entire population. We find  
417 that the most dominant cancer-specific altered networks in unstable cancers were enriched with  
418 meiotic and kinetochore but not in stable cancers. The experimental overexpression of meiosis and  
419 kinetochore genes in cancer cell lines induced genomic instability phenotypes: anaphase bridges  
420 (right) and spindle defects (multipolar spindle, left).

421

422 **Figure 2. Distribution of Large Copy number variation (LCNVs) values in different cancer**  
423 **types.** Bladder cancer has a high number of DNA regions with LCNVs (max 850, avg LCNVs=  
424 112) followed by breast cancer and stomach cancers (max 821, avg LCNVs =109 and max 650 avg  
425 CNVs = 108 respectively). These three cancer types are categorized as unstable cancer types  
426 ( $p < 0.001$ ). On the other hand, colorectal, and cervical cancer types have a low number of DNA  
427 regions with LCNVs (max 402, avg LCNVs=79 and max 278, avg LCNVs= 80 respectively), and  
428 are categorized as more stable cancer types. Fig. 2A shows the full distribution of LCNVs values

429 in all samples, while Fig. 2B shows a zoom-in on cases having up to 300 DNA regions with ICNVs  
430 (low CNV values).

431

432 **Figure 3. Involvement of kinetochore and meiosis genes in unbalanced processes as**  
433 **identified using surprisal analysis in both unstable and stable cancers. (A)** Every dataset is  
434 profiled for thousands of transcripts (total 20,530), which are resolved into altered networks  
435 (unbalanced processes) characterizing each tumor and normal tissue. All transcripts, which  
436 deviate from the balance state in the same (coordinated) way, are organized in groups,  
437 unbalanced processes (lower panel). **(B)** Amplitudes ( $\lambda_1(k)$ ), representing an importance of a  
438 process  $\alpha$  in each tissue, are shown for the most dominant process 1 in breast dataset. Tumor  
439 tissues are represented by blue dots and normal tissues by orange. This process clearly  
440 distinguishes between cancer (blue dots) and non- cancer (orange dots) tissues. For example,  
441 21% of cancer tissues harbor this unbalanced processes (tissues with positive ( $\lambda_1(k)$ ) amplitudes).  
442 The blue box marks threshold limits. **(C)** Meiosis (red) and kinetochore (green) genes were  
443 found to participate in the most cancer-specific dominant processes in breast cancer: processes 1  
444 and 2.  
445 **(D)** Meiosis (red) and kinetochore (green) genes were found to participate in the most cancer-  
446 specific dominant processes in bladder cancer: processes 2, 3 and 4 and stomach cancer:  
447 processes 1 and 3. There is a significantly lower percentage of meiosis and kinetochore genes in  
448 the dominant processes characterizing colorectal and cervical cancers (lower panel).

449

450 **Figure 4. The correlation between over-expression of meiosis/kinetochore genes and genomic**  
451 **instability within each cancer type.** Unstable breast (A), bladder (B) and stomach cancers (C)  
452 were analyzed separately as following: Distribution of ICNVs values was generated for each  
453 cancer type. 10% of the samples with highest ICNVs values (unstable group) and 10% of the  
454 samples with lowest ICNVs values (stable group) were selected in each cancer type. Cancer  
455 specific unbalanced processes of 10% of the samples with highest ICNVs values were compared  
456 to the processes appeared in 10% of the samples with lowest ICNVs values. The most dominant  
457 processes harboring meiosis/kinetochore genes appeared in more patients in the unstable group in  
458 all three cancer types.

459

460 **Figure 5. Overexpression of meiosis (DMC1 and SMC1B compared to REC8 as a control)**  
461 **and kinetochore genes (CENP-A and HJURP) causes a genomic instability phenotype.** The  
462 effect of overexpressed meiosis and kinetochore genes in stable (HCT116) and unstable (MCF-7)  
463 cancer cell lines was measured by staining cells with DAPI and anti-tubulin IF (see Methods).  
464 Scoring the cells for genome instability was performed by counting defects during anaphase  
465 (anaphase bridges, lagging chromosomes) and apparent spindle formation defects (multipolar and  
466 unipolar). Presented are immunofluorescence images showing the effects of overexpression of  
467 meiosis (DMC1) and kinetochore (CENP-A) genes. Showing abnormal cell divisions i.e.  
468 Anaphase Bridge (**B**) and lagging chromosomes (**C**) and apparent spindle formation defects  
469 (unipolar **E** and tripolar **F**). Quantification of chromosome segregation and spindle defects in  
470 meiosis and kinetochore transfected stable cell line HCT116 shows more significant defects  
471 compared to the MCF 7 cell line (**G-J**). Statistical significance is shown by asterisks (\* $P < 0.05$ ;  
472 \*\* $P < 0.01$ ; \*\*\* $P < 0.001$ ). Scale bar equals 10 $\mu$ m.

473  
474 **Figure 6. Overexpression of meiosis (DMC1 and SMC1B) and kinetochore genes (CENP-A**  
475 **and HJURP) causes elevated invasiveness** Overexpressed meiotic and kinetochore genes in a  
476 stable cell line (HCT 116) have the ability to promote invasiveness in a soft agar assay. A soft agar  
477 colony formation assay was applied for the detection of transformed cells when overexpressed  
478 with meiotic and kinetochore genes. The number of colonies (**A**) and size of the colonies (**B**) were  
479 compared (see Methods). Statistically significant differences compared with empty vector (No  
480 genes) were determined using a Student's 2-tailed t test (\* $P < 0.05$ ; \*\* $P < 0.01$ ; \*\*\* $P < 0.001$ )

481  
482 **Figure S1. Distribution of Large Copy number variation (LCNVs) values in different cancer**  
483 **types in additional cutoffs (0.5Mb and 2Mb).** The distribution of LCNVs in the different cancer  
484 types in two additional cutoffs: LCNVs larger than 0.5Mb (**A**) and larger than 2Mb (**B**). The  
485 analysis of these threshold did not change the classification of the tumors into two distinct groups  
486 with high and low amounts of LCNVs.

487  
488 **Figure S2. The correlation between over-expression of meiosis/kinetochore genes and**  
489 **genomic instability within each cancer type (stable cancers: cervical cancer (A) and**  
490 **colorectal cancer (B)).** Cancers that more genomically stable (lower LCNV values) cervical and



491 colorectal cancers were analyzed separately as following: Distribution of ICNVs values was  
492 generated for each cancer type. 10% of the samples with highest ICNVs values (unstable group)  
493 and 10% of the samples with lowest ICNVs values (stable group) were selected in each cancer  
494 type. Cancer specific unbalanced processes of 10% of the samples with highest ICNVs values were  
495 compared to the processes appeared in 10% of the samples with lowest ICNVs values. The most  
496 dominant processes appeared in the same percentage of patients in the stable and unstable group  
497 in the two cancer types.

498

499 **Figure S3: Over expression of meiosis and kinetochore genes:** Meiosis/kinetochore genes were  
500 fused to GFP and the over-expression pattern in the cell lines shows that the overexpression was  
501 successful. Overexpression of meiotic genes (DMC1, SMC1B, REC8) and kinetochore genes  
502 (CENP-A and HJURP) in the HCT 116 cell line and MCF-7 cell line is presented.

503

504 **Figure S4: Meiosis/kinetochore genes induce number and size of colonies in soft agar.**  
505 HCT116 and MCF7 cells overexpressing the meiosis/kinetochore genes mentioned above were  
506 seeded in soft agar. Representative images of soft agar assay for HCT116 and MCF-7 cell lines  
507 are shown.

508

509 **Figure S5:** A soft agar colony formation assay was applied for the detection of transformed cells  
510 when overexpressed with meiotic and kinetochore genes in an unstable cell line (MCF-7). The  
511 number of colonies (**Fig A**) and size of the colonies (**Fig B**) were measured using imageJ.  
512 Statistically significant differences compared with empty vector (No genes) were determined using  
513 a Student's 2-tailed t test (\*P < 0.05; \*\*P < 0.01; \*\*\*P < 0.001).

514

515

516

#### 517 **Acknowledgments:**

518 We thank the Klutstein and Kravchenko-Balasha labs for fruitful discussions. This work was  
519 supported by a research grant from the Israeli Cancer Association (grant number 20190056) to  
520 MK and NKB; a special donation from the ICA USA section and Israel Science Foundation to  
521 NKB.

522

523 **Availability of data and reagents:**

524 The authors affirm that all data necessary for confirming the conclusions of this article are  
525 represented fully within the article and its tables and figures. All the necessary reagents from this  
526 study can be shared.

527

528 **References:**

- 529 1. Nakade, S.; Yamamoto, T.; Sakuma, T. Cancer induction and suppression with  
530 transcriptional control and epigenome editing technologies. *Journal of human genetics*  
531 **2018**, *63*, 187-194, doi:10.1038/s10038-017-0377-8.
- 532 2. Ko, J.Y.; Oh, S.; Yoo, K.H. Functional Enhancers As Master Regulators of Tissue-Specific  
533 Gene Regulation and Cancer Development. *Molecules and cells* **2017**, *40*, 169-177,  
534 doi:10.14348/molcells.2017.0033.
- 535 3. Klutstein, M.; Nejman, D.; Greenfield, R.; Cedar, H. DNA Methylation in Cancer and Aging.  
536 *Cancer Res* **2016**, *76*, 3446-3450, doi:10.1158/0008-5472.CAN-15-3278.
- 537 4. Bruggeman, J.W.; Koster, J.; Lodder, P.; Repping, S.; Hamer, G. Massive expression of germ  
538 cell-specific genes is a hallmark of cancer and a potential target for novel treatment  
539 development. *Oncogene* **2018**, *37*, 5694-5700, doi:10.1038/s41388-018-0357-2.
- 540 5. Whitehurst, A.W. Cause and consequence of cancer/testis antigen activation in cancer.  
541 *Annual review of pharmacology and toxicology* **2014**, *54*, 251-272, doi:10.1146/annurev-  
542 pharmtox-011112-140326.
- 543 6. Lindsey, S.F.; Byrnes, D.M.; Eller, M.S.; Rosa, A.M.; Dabas, N.; Escandon, J.; Grichnik, J.M.  
544 Potential role of meiosis proteins in melanoma chromosomal instability. *Journal of skin*  
545 *cancer* **2013**, *2013*, 190109, doi:10.1155/2013/190109.
- 546 7. Krem, M.M.; Press, O.W.; Horwitz, M.S.; Tidwell, T. Mechanisms and clinical applications  
547 of chromosomal instability in lymphoid malignancy. *British journal of haematology* **2015**,  
548 *171*, 13-28, doi:10.1111/bjh.13507.
- 549 8. Burrell, R.A.; McClelland, S.E.; Endesfelder, D.; Groth, P.; Weller, M.C.; Shaikh, N.;  
550 Domingo, E.; Kanu, N.; Dewhurst, S.M.; Gronroos, E., et al. Replication stress links  
551 structural and numerical cancer chromosomal instability. *Nature* **2013**, *494*, 492-496,  
552 doi:10.1038/nature11935.
- 553 9. Musacchio, A. The Molecular Biology of Spindle Assembly Checkpoint Signaling Dynamics.  
554 *Current biology : CB* **2015**, *25*, R1002-1018, doi:10.1016/j.cub.2015.08.051.
- 555 10. Foijer, F.; Xie, S.Z.; Simon, J.E.; Bakker, P.L.; Conte, N.; Davis, S.H.; Kregel, E.; Jonkers, J.;  
556 Bradley, A.; Sorger, P.K. Chromosome instability induced by Mps1 and p53 mutation  
557 generates aggressive lymphomas exhibiting aneuploidy-induced stress. *Proceedings of*  
558 *the National Academy of Sciences of the United States of America* **2014**, *111*, 13427-  
559 13432, doi:10.1073/pnas.1400892111.
- 560 11. Iwaizumi, M.; Shinmura, K.; Mori, H.; Yamada, H.; Suzuki, M.; Kitayama, Y.; Igarashi, H.;  
561 Nakamura, T.; Suzuki, H.; Watanabe, Y., et al. Human Sgo1 downregulation leads to

- 562 chromosomal instability in colorectal cancer. *Gut* **2009**, *58*, 249-260,  
563 doi:10.1136/gut.2008.149468.
- 564 12. Sakuno, T.; Tada, K.; Watanabe, Y. Kinetochore geometry defined by cohesion within the  
565 centromere. *Nature* **2009**, *458*, 852-858, doi:10.1038/nature07876.
- 566 13. Watanabe, Y.; Nurse, P. Cohesin Rec8 is required for reductional chromosome  
567 segregation at meiosis. *Nature* **1999**, *400*, 461-464, doi:10.1038/22774.
- 568 14. Ishiguro, K.; Kim, J.; Fujiyama-Nakamura, S.; Kato, S.; Watanabe, Y. A new meiosis-specific  
569 cohesin complex implicated in the cohesin code for homologous pairing. *EMBO reports*  
570 **2011**, *12*, 267-275, doi:10.1038/embor.2011.2.
- 571 15. Hunter, N. Meiotic Recombination: The Essence of Heredity. *Cold Spring Harbor*  
572 *perspectives in biology* **2015**, *7*, doi:10.1101/cshperspect.a016618.
- 573 16. Feichtinger, J.; Larcombe, L.; McFarlane, R.J. Meta-analysis of expression of I(3)mbt  
574 tumor-associated germline genes supports the model that a soma-to-germline transition  
575 is a hallmark of human cancers. *International journal of cancer* **2014**, *134*, 2359-2365,  
576 doi:10.1002/ijc.28577.
- 577 17. Erenpreisa, J.; Cragg, M.S.; Salmina, K.; Hausmann, M.; Scherthan, H. The role of meiotic  
578 cohesin REC8 in chromosome segregation in gamma irradiation-induced endopolyploid  
579 tumour cells. *Experimental cell research* **2009**, *315*, 2593-2603,  
580 doi:10.1016/j.yexcr.2009.05.011.
- 581 18. Kalejs, M.; Ivanov, A.; Plakhins, G.; Cragg, M.S.; Emzinsh, D.; Illidge, T.M.; Erenpreisa, J.  
582 Upregulation of meiosis-specific genes in lymphoma cell lines following genotoxic insult  
583 and induction of mitotic catastrophe. *BMC cancer* **2006**, *6*, 6, doi:10.1186/1471-2407-6-  
584 6.
- 585 19. Gong, C.; Li, T.; Li, Q.; Yan, L.; Wang, T. Rice OsRAD21-2 is expressed in actively dividing  
586 tissues and its ectopic expression in yeast results in aberrant cell division and growth.  
587 *Journal of integrative plant biology* **2011**, *53*, 14-24, doi:10.1111/j.1744-  
588 7909.2010.01009.x.
- 589 20. Folco, H.D.; Chalamcharla, V.R.; Sugiyama, T.; Thillainadesan, G.; Zofall, M.; Balachandran,  
590 V.; Dhakshnamoorthy, J.; Mizuguchi, T.; Grewal, S.I. Untimely expression of gametogenic  
591 genes in vegetative cells causes uniparental disomy. *Nature* **2017**, *543*, 126-130,  
592 doi:10.1038/nature21372.
- 593 21. Pesenti, M.E.; Weir, J.R.; Musacchio, A. Progress in the structural and functional  
594 characterization of kinetochores. *Current opinion in structural biology* **2016**, *37*, 152-163,  
595 doi:10.1016/j.sbi.2016.03.003.
- 596 22. Pavin, N.; Tolic, I.M. Self-Organization and Forces in the Mitotic Spindle. *Annual review of*  
597 *biophysics* **2016**, *45*, 279-298, doi:10.1146/annurev-biophys-062215-010934.
- 598 23. Thangavelu, P.U.; Lin, C.Y.; Vaidyanathan, S.; Nguyen, T.H.M.; Dray, E.; Duijf, P.H.G.  
599 Overexpression of the E2F target gene CENPI promotes chromosome instability and  
600 predicts poor prognosis in estrogen receptor-positive breast cancer. *Oncotarget* **2017**, *8*,  
601 62167-62182, doi:10.18632/oncotarget.19131.
- 602 24. Qi, S.T.; Wang, Z.B.; Ouyang, Y.C.; Zhang, Q.H.; Hu, M.W.; Huang, X.; Ge, Z.; Guo, L.; Wang,  
603 Y.P.; Hou, Y., et al. Overexpression of SETbeta, a protein localizing to centromeres, causes  
604 precocious separation of chromatids during the first meiosis of mouse oocytes. *Journal of*  
605 *cell science* **2013**, *126*, 1595-1603, doi:10.1242/jcs.116541.

- 606 25. Klutstein, M.; Fennell, A.; Fernandez-Alvarez, A.; Cooper, J.P. The telomere bouquet  
607 regulates meiotic centromere assembly. *Nat Cell Biol* **2015**, *17*, 458-469,  
608 doi:10.1038/ncb3132.
- 609 26. Tomonaga, T.; Matsushita, K.; Yamaguchi, S.; Oohashi, T.; Shimada, H.; Ochiai, T.; Yoda,  
610 K.; Nomura, F. Overexpression and mistargeting of centromere protein-A in human  
611 primary colorectal cancer. *Cancer research* **2003**, *63*, 3511-3516.
- 612 27. McGregor, M.; Hariharan, N.; Joyo, A.Y.; Margolis, R.L.; Sussman, M.A. CENP-A is essential  
613 for cardiac progenitor cell proliferation. *Cell cycle (Georgetown, Tex.)* **2014**, *13*, 739-748,  
614 doi:10.4161/cc.27549.
- 615 28. Lermontova, I.; Koroleva, O.; Rutten, T.; Fuchs, J.; Schubert, V.; Moraes, I.; Koszegi, D.;  
616 Schubert, I. Knockdown of CENH3 in Arabidopsis reduces mitotic divisions and causes  
617 sterility by disturbed meiotic chromosome segregation. *The Plant journal : for cell and*  
618 *molecular biology* **2011**, *68*, 40-50, doi:10.1111/j.1365-313X.2011.04664.x.
- 619 29. Zhang, W.; Mao, J.H.; Zhu, W.; Jain, A.K.; Liu, K.; Brown, J.B.; Karpen, G.H. Centromere and  
620 kinetochore gene misexpression predicts cancer patient survival and response to  
621 radiotherapy and chemotherapy. *Nature communications* **2016**, *7*, 12619,  
622 doi:10.1038/ncomms12619.
- 623 30. Flashner-Abramson, E.; Abramson, J.; White, F.M.; Kravchenko-Balasha, N. A  
624 thermodynamic-based approach for the resolution and prediction of protein network  
625 structures. *Chemical Physics* **2018**, *514*, 20-30,  
626 doi:<https://doi.org/10.1016/j.chemphys.2018.03.005>.
- 627 31. Flashner-Abramson, E.; Vasudevan, S.; Adejumobi, I.A.; Sonnenblick, A.; Kravchenko-  
628 Balasha, N. Decoding cancer heterogeneity: studying patient-specific signaling signatures  
629 towards personalized cancer therapy. *Theranostics* **2019**, *9*, 5149-5165,  
630 doi:10.7150/thno.31657.
- 631 32. Remacle, F.; Kravchenko-Balasha, N.; Levitzki, A.; Levine, R.D. Information-theoretic  
632 analysis of phenotype changes in early stages of carcinogenesis. *Proceedings of the*  
633 *National Academy of Sciences of the United States of America* **2010**, *107*, 10324-10329,  
634 doi:10.1073/pnas.1005283107.
- 635 33. Vasudevan, S.; Flashner-Abramson, E.; Remacle, F.; Levine, R.D.; Kravchenko-Balasha, N.  
636 Personalized disease signatures through information-theoretic compaction of big cancer  
637 data. *Proceedings of the National Academy of Sciences of the United States of America*  
638 **2018**, *115*, 7694-7699, doi:10.1073/pnas.1804214115.
- 639 34. Kim, J.A.; Tan, Y.; Wang, X.; Cao, X.; Veeraraghavan, J.; Liang, Y.; Edwards, D.P.; Huang, S.;  
640 Pan, X.; Li, K., et al. Comprehensive functional analysis of the tousel-like kinase 2  
641 frequently amplified in aggressive luminal breast cancers. *Nature communications* **2016**,  
642 *7*, 12991, doi:10.1038/ncomms12991.
- 643 35. Itsara, A.; Cooper, G.M.; Baker, C.; Girirajan, S.; Li, J.; Absher, D.; Krauss, R.M.; Myers,  
644 R.M.; Ridker, P.M.; Chasman, D.I., et al. Population analysis of large copy number variants  
645 and hotspots of human genetic disease. *Am J Hum Genet* **2009**, *84*, 148-161,  
646 doi:10.1016/j.ajhg.2008.12.014.
- 647 36. Flashner-Abramson E, V.S., Adejumobi IA, Sonnenblick A, Kravchenko-Balasha N. .  
648 Decoding cancer heterogeneity: studying patient-specific signaling signatures towards  
649 personalized cancer therapy. *Theranostics*. **2019**.

- 650 37. Flashner-Abramson E, V.S., Adejumobi IA, Sonnenblick A, Kravchenko-Balasha N. .  
651 Decoding cancer heterogeneity: studying patient-specific signaling signatures towards  
652 personalized cancer therapy. . In *Theranostics*, 2019.
- 653 38. Stellfox, M.E.; Bailey, A.O.; Foltz, D.R. Putting CENP-A in its place. *Cellular and molecular*  
654 *life sciences : CMLS* **2013**, *70*, 387-406, doi:10.1007/s00018-012-1048-8.
- 655 39. Fukagawa, T.; Earnshaw, W.C. The centromere: chromatin foundation for the kinetochore  
656 machinery. *Developmental cell* **2014**, *30*, 496-508, doi:10.1016/j.devcel.2014.08.016.
- 657 40. Zasadzinska, E.; Foltz, D.R. Orchestrating the Specific Assembly of Centromeric  
658 Nucleosomes. *Progress in molecular and subcellular biology* **2017**, *56*, 165-192,  
659 doi:10.1007/978-3-319-58592-5\_7.
- 660 41. Takabayashi, S.; Yamauchi, Y.; Tsume, M.; Noguchi, M.; Katoh, H. A spontaneous smc1b  
661 mutation causes cohesin protein dysfunction and sterility in mice. *Experimental biology*  
662 *and medicine (Maywood, N.J.)* **2009**, *234*, 994-1001, doi:10.3181/0808-rm-244.
- 663 42. Murdoch, B.; Owen, N.; Stevense, M.; Smith, H.; Nagaoka, S.; Hassold, T.; McKay, M.; Xu,  
664 H.; Fu, J.; Revenkova, E., et al. Altered cohesin gene dosage affects Mammalian meiotic  
665 chromosome structure and behavior. *PLoS genetics* **2013**, *9*, e1003241,  
666 doi:10.1371/journal.pgen.1003241.
- 667 43. Rankin, S. Complex elaboration: making sense of meiotic cohesin dynamics. *The FEBS*  
668 *journal* **2015**, *282*, 2426-2443, doi:10.1111/febs.13301.
- 669 44. Ben-David, U.; Siranosian, B.; Ha, G.; Tang, H.; Oren, Y.; Hinohara, K.; Strathdee, C.A.;  
670 Dempster, J.; Lyons, N.J.; Burns, R., et al. Genetic and transcriptional evolution alters  
671 cancer cell line drug response. *Nature* **2018**, *560*, 325-330, doi:10.1038/s41586-018-  
672 0409-3.
- 673 45. Case, C.M.; Sackett, D.L.; Wangsa, D.; Karpova, T.; McNally, J.G.; Ried, T.; Camps, J. CKAP2  
674 ensures chromosomal stability by maintaining the integrity of microtubule nucleation  
675 sites. *PloS one* **2013**, *8*, e64575, doi:10.1371/journal.pone.0064575.
- 676 46. Hudson, D.F.; Amor, D.J.; Boys, A.; Butler, K.; Williams, L.; Zhang, T.; Kalitsis, P. Loss of  
677 RMI2 Increases Genome Instability and Causes a Bloom-Like Syndrome. *PLoS genetics*  
678 **2016**, *12*, e1006483, doi:10.1371/journal.pgen.1006483.
- 679 47. Staples, C.J.; Myers, K.N.; Beveridge, R.D.; Patil, A.A.; Lee, A.J.; Swanton, C.; Howell, M.;  
680 Boulton, S.J.; Collis, S.J. The centriolar satellite protein Cep131 is important for genome  
681 stability. *Journal of cell science* **2012**, *125*, 4770-4779, doi:10.1242/jcs.104059.
- 682 48. Wangsa, D.; Quintanilla, I.; Torabi, K.; Vila-Casadesus, M.; Ercilla, A.; Klus, G.; Yuce, Z.;  
683 Galofre, C.; Cuatrecasas, M.; Lozano, J.J., et al. Near-tetraploid cancer cells show  
684 chromosome instability triggered by replication stress and exhibit enhanced invasiveness.  
685 *FASEB journal : official publication of the Federation of American Societies for*  
686 *Experimental Biology* **2018**, *32*, 3502-3517, doi:10.1096/fj.201700247RR.
- 687 49. Chua, M.L.K.; Lo, W.; Pintilie, M.; Murgic, J.; Lalonde, E.; Bhandari, V.; Mahamud, O.;  
688 Gopalan, A.; Kweldam, C.F.; van Leenders, G., et al. A Prostate Cancer "Nimbusus":  
689 Genomic Instability and SCHLAP1 Dysregulation Underpin Aggression of Intraductal and  
690 Cribriform Subpathologies. *European urology* **2017**, *72*, 665-674,  
691 doi:10.1016/j.eururo.2017.04.034.
- 692 50. Pan, Y.; Tong, J.H.M.; Lung, R.W.M.; Kang, W.; Kwan, J.S.H.; Chak, W.P.; Tin, K.Y.; Chung,  
693 L.Y.; Wu, F.; Ng, S.S.M., et al. RASAL2 promotes tumor progression through LATS2/YAP1

- 694 axis of hippo signaling pathway in colorectal cancer. *Mol Cancer* **2018**, *17*, 102,  
695 doi:10.1186/s12943-018-0853-6.
- 696 51. Geng, C.H.; Zhang, C.L.; Zhang, J.Y.; Gao, P.; He, M.; Li, Y.L. Overexpression of Sirt6 is a  
697 novel biomarker of malignant human colon carcinoma. *Journal of cellular biochemistry*  
698 **2018**, *119*, 3957-3967, doi:10.1002/jcb.26539.
- 699 52. Negrini, S.; Gorgoulis, V.G.; Halazonetis, T.D. Genomic instability--an evolving hallmark of  
700 cancer. *Nature reviews. Molecular cell biology* **2010**, *11*, 220-228, doi:10.1038/nrm2858.  
701  
702  
703  
704  
705  
706

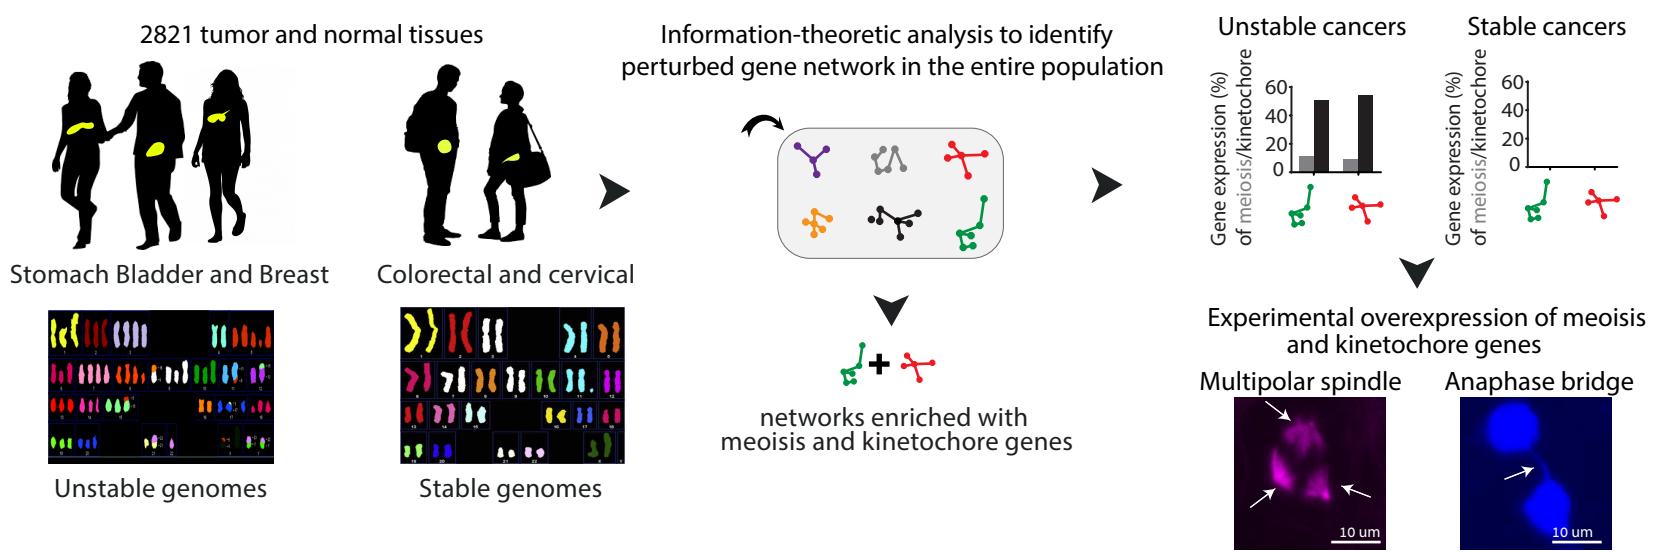

Meiosis and kinetochore genes induce chromosomal instability

Figure 1

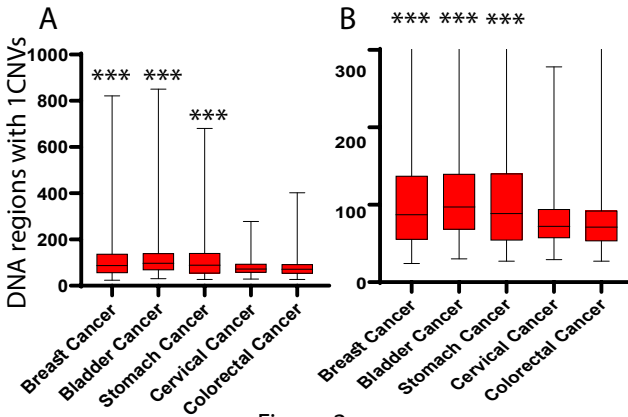

Figure 2



Figure 3

A

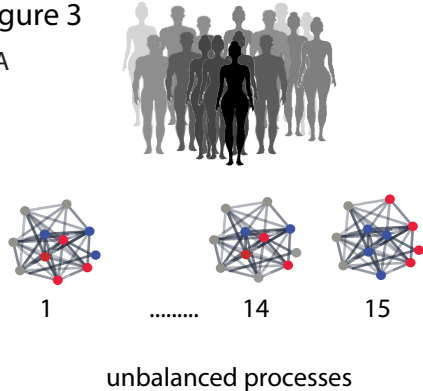

B

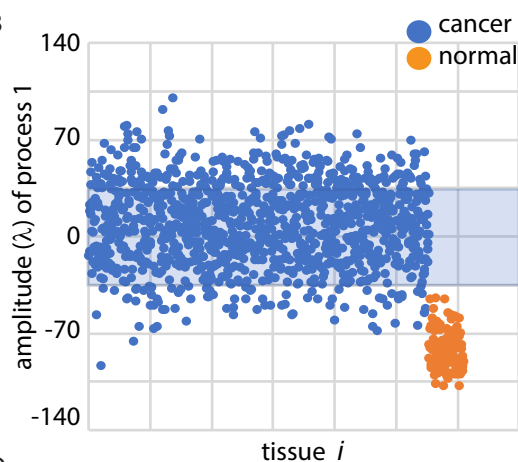

C

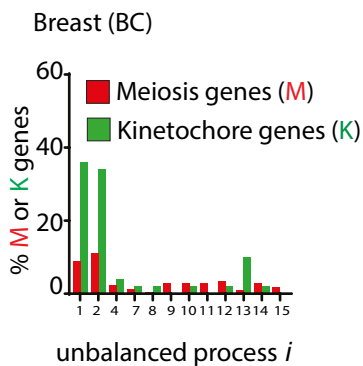

D

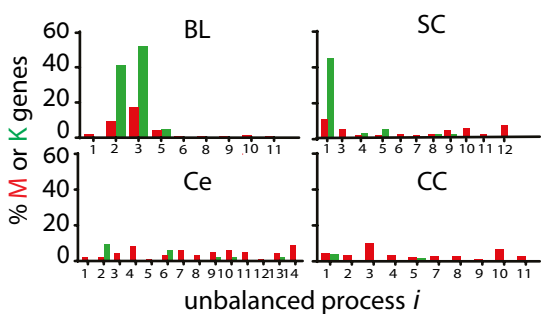

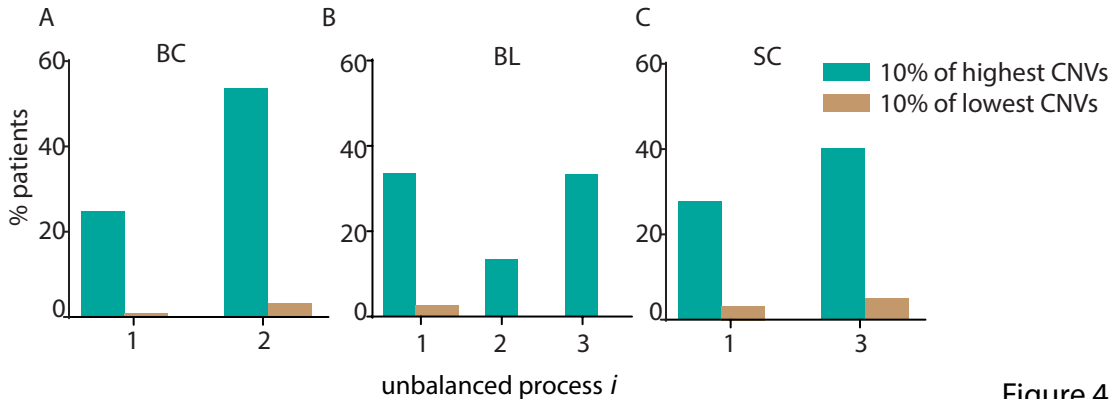

Figure 4

Figure 5

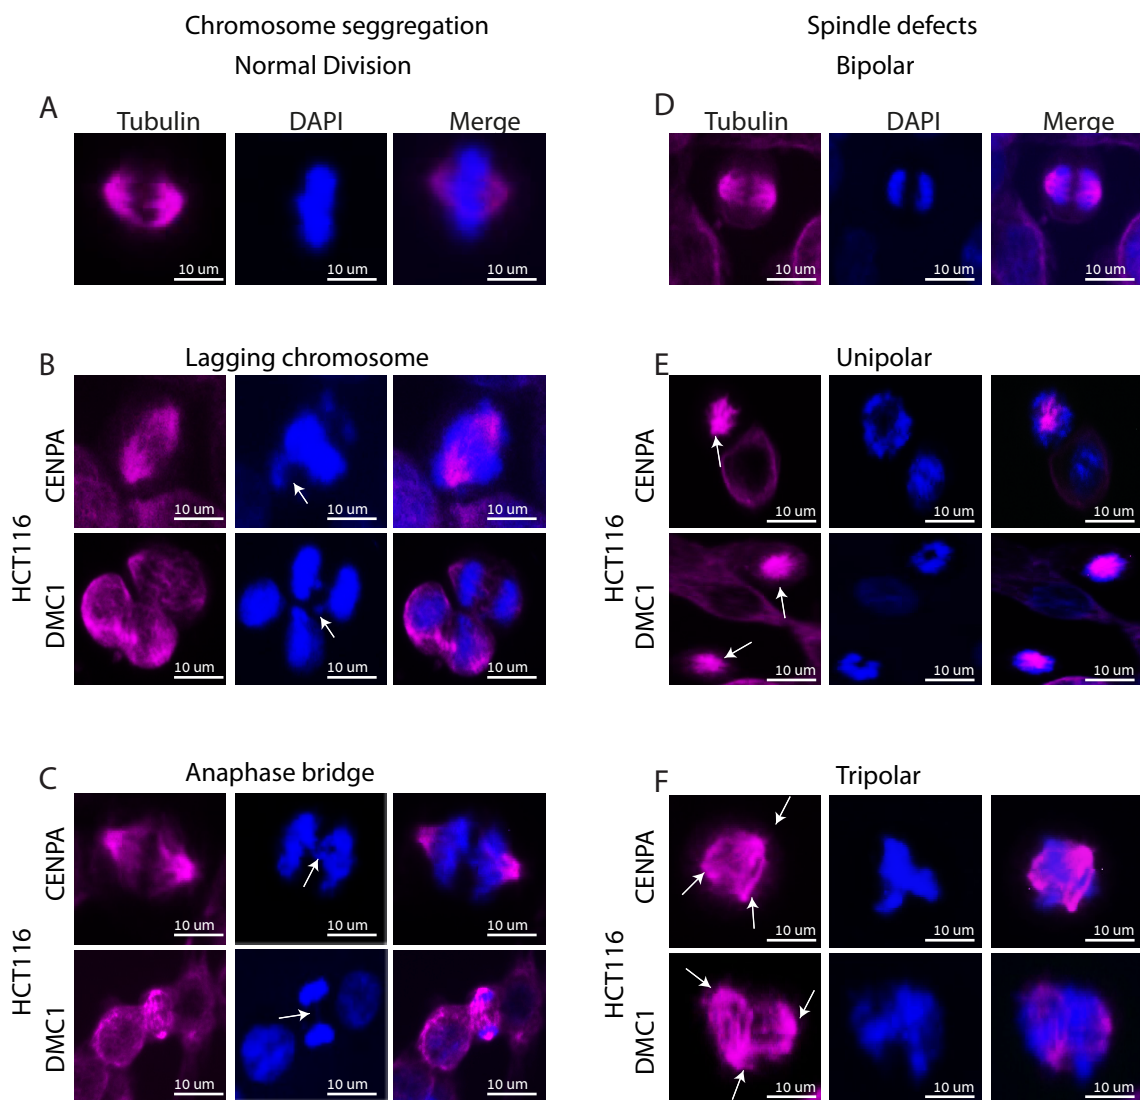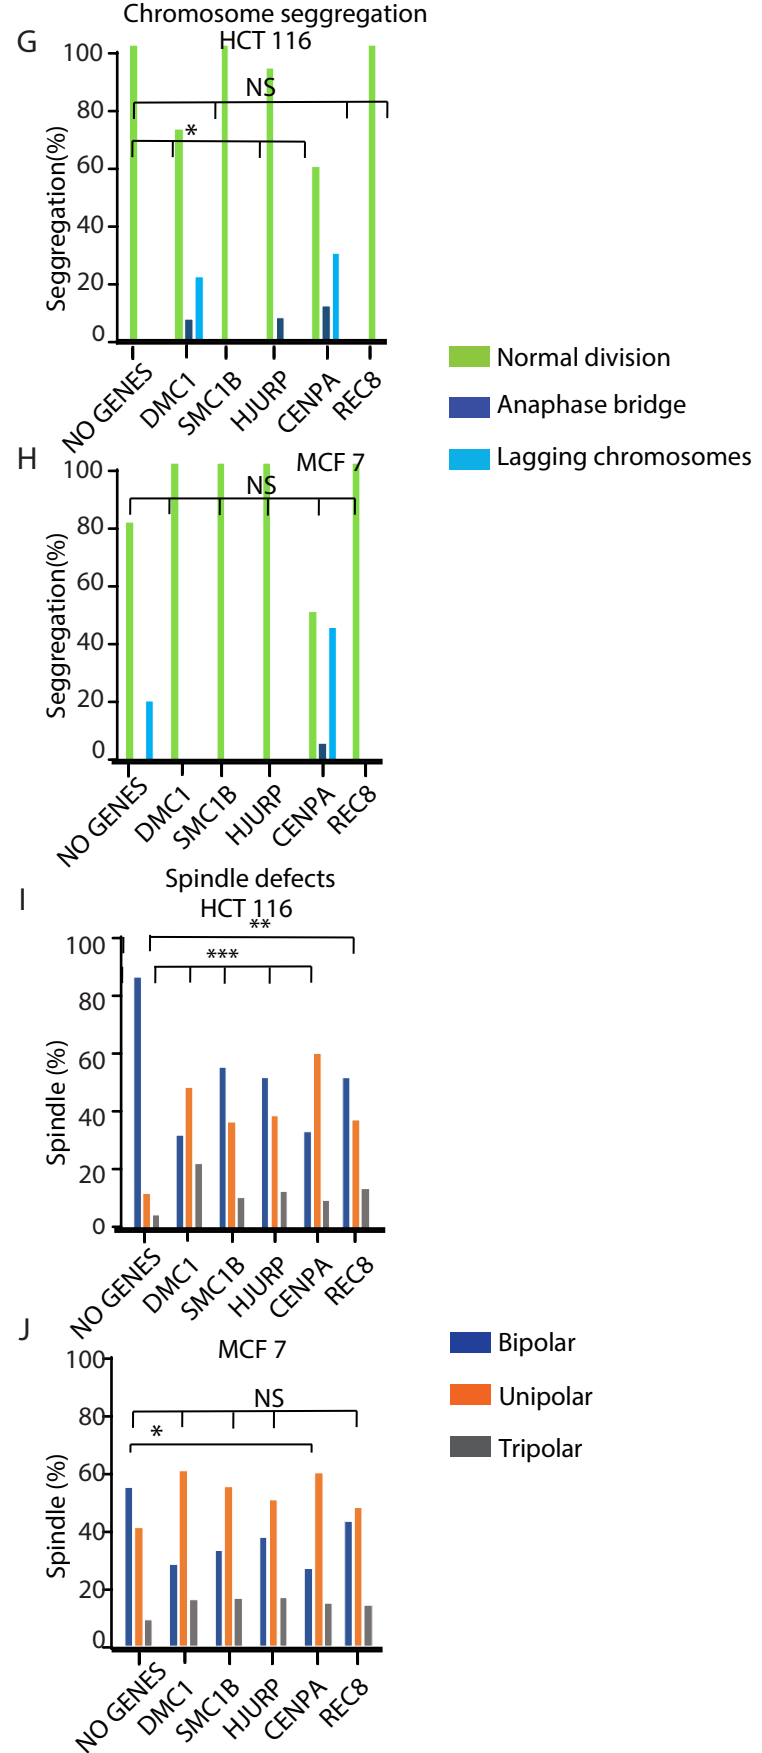

Figure 6

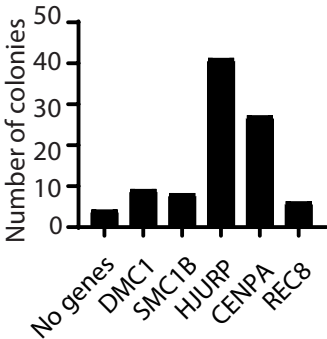

B

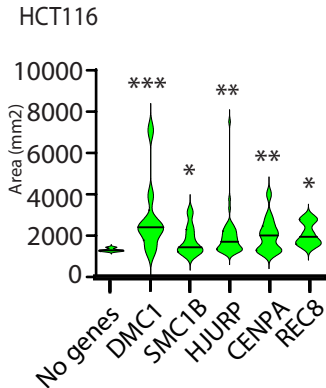

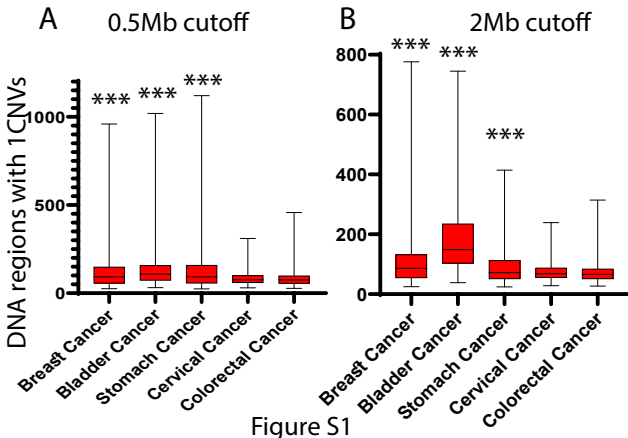

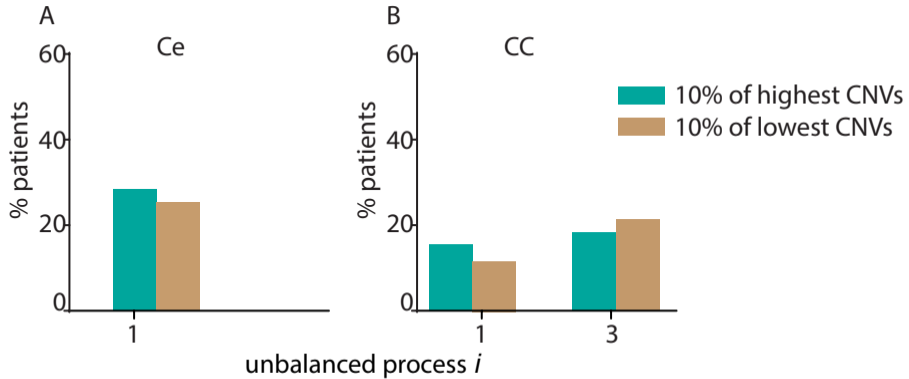

Figure S2

Figure S3

HCT116

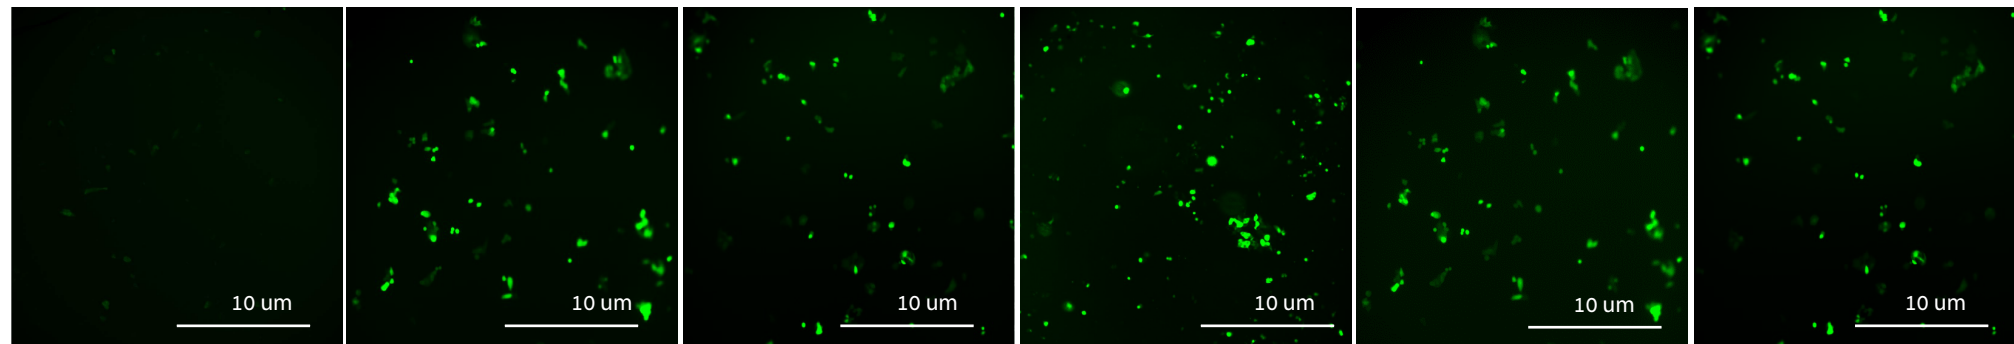

NO genes

DMC1

SMC1B

HJURP

CENP-A

REC-8

MCF-7

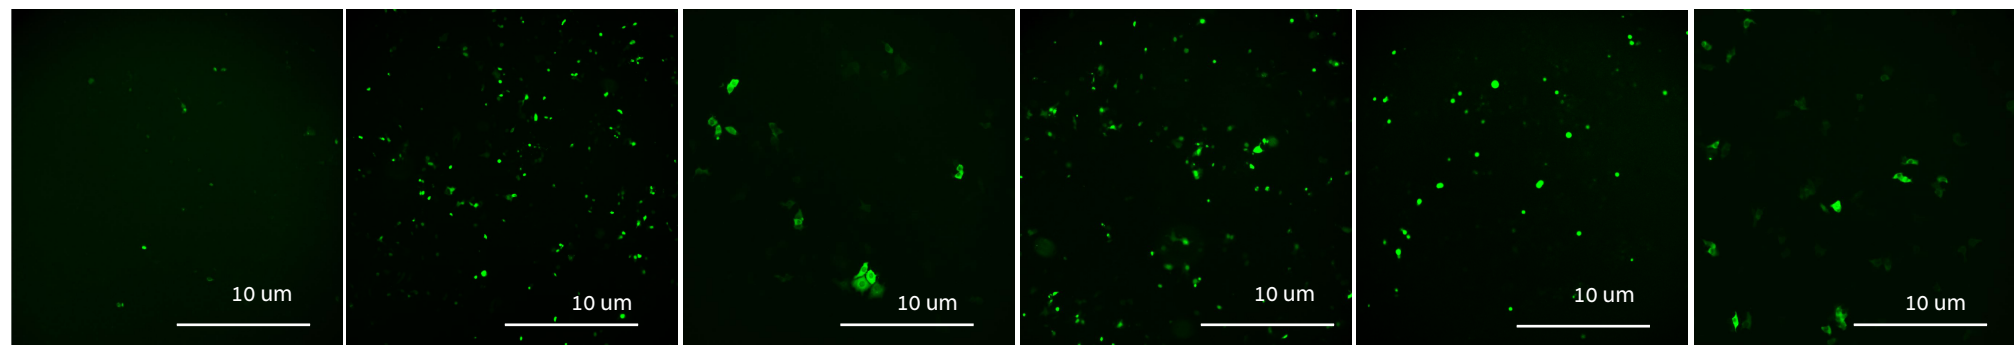

NO genes

DMC1

SMC1B

HJURP

CENP-A

REC-8

Figure S4

HCT116

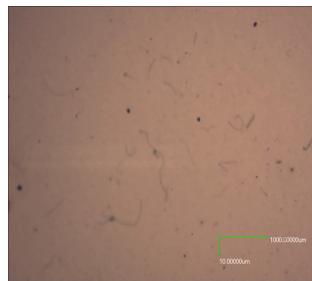

NO genes

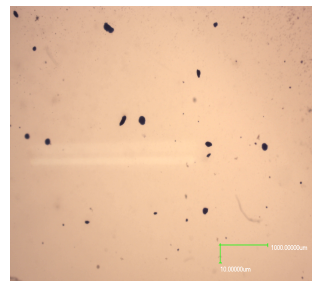

DMC1

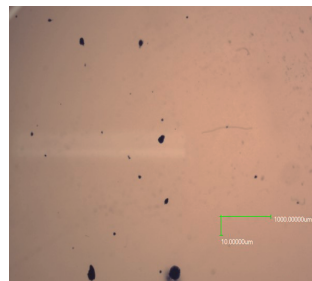

SMC1B

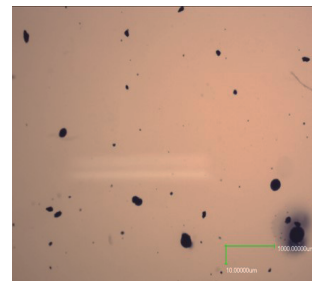

HJURP  
MCF-7

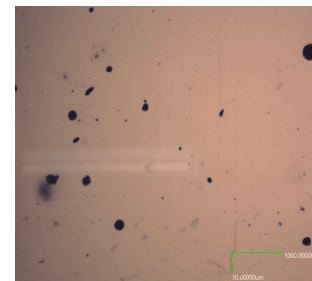

CENP-A

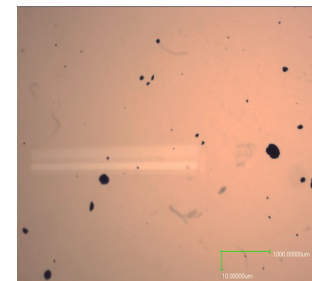

REC-8

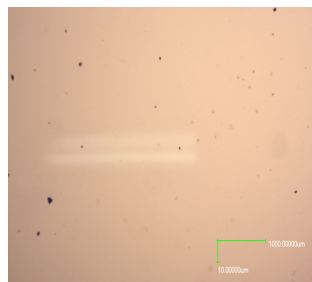

NO genes

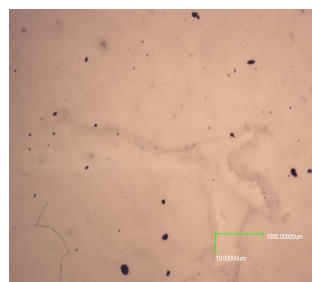

DMC1

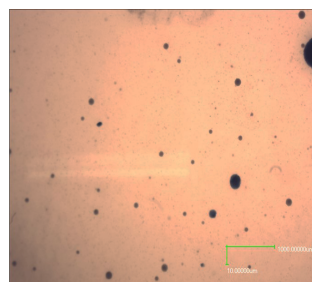

SMC1B

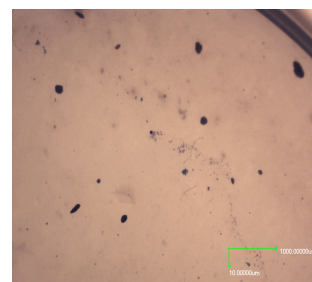

HJURP

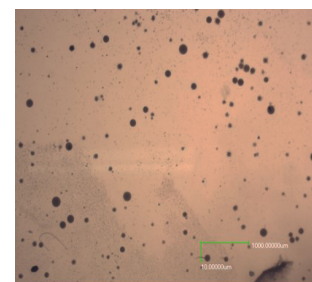

CENP-A

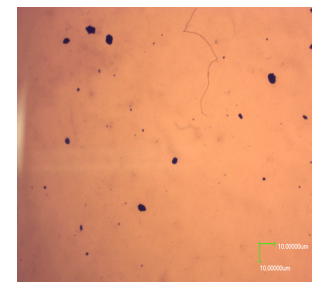

REC-8



Figure S5

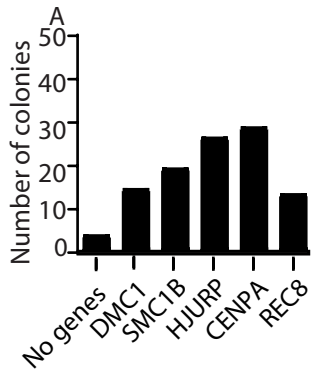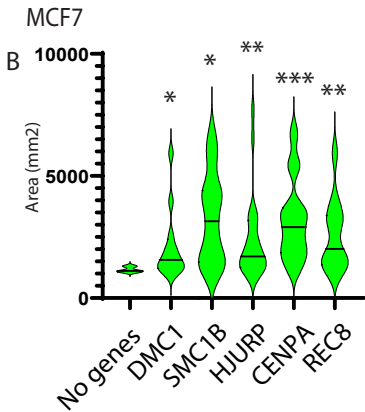

Source: https://www.biorxiv.org/content/10.1101/826081v2.full.pdf
